# Supplementary material for: Growth–regime–controlled synthesis of CdS–Bi2S3 and Bi2S3 nanocrystals during the dissolution–recrystallization processes
Source: Royal Society of Chemistry journal article supplement (doi:10.1039/c004208k), 2010-01-01
Supplement: c004208k.pdf [file c004208k.pdf]

# Growth–Regime–Controlled Synthesis of CdS–Bi<sub>2</sub>S<sub>3</sub> and Bi<sub>2</sub>S<sub>3</sub> Nanocrystals during the Dissolution–Recrystallization Processes

*Xiaobo He, Lian Gao<sup>\*</sup>, Songwang Yang and Jing Sun*

State key Laboratory of High Performance Ceramics and Superfine

Microstructure, Shanghai Institute of Ceramics, Chinese Academy of Sciences,

1295 Dingxi Road, Shanghai 200050, People's Republic of China

\*To whom correspondence should be addressed. E-mail: [liangaoc@online.sh.cn](mailto:liangaoc@online.sh.cn)

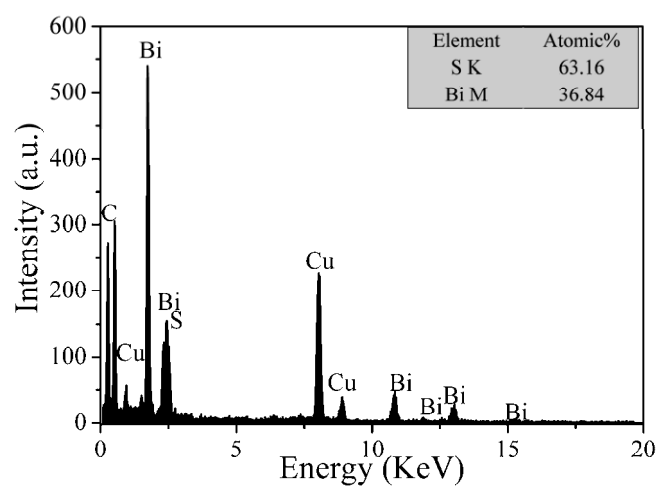

**Fig. S1** EDS spectrum collected from the  $\beta$ -NR shown in Fig. 2c.

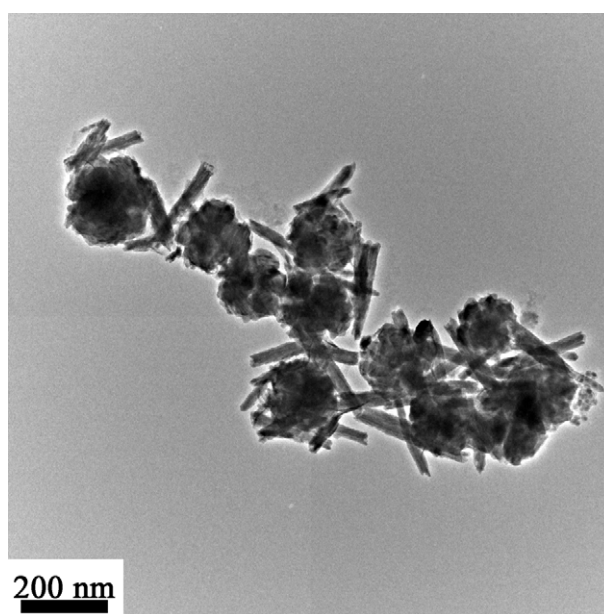

**Fig. S2** The low-magnification TEM image of the sample S1.

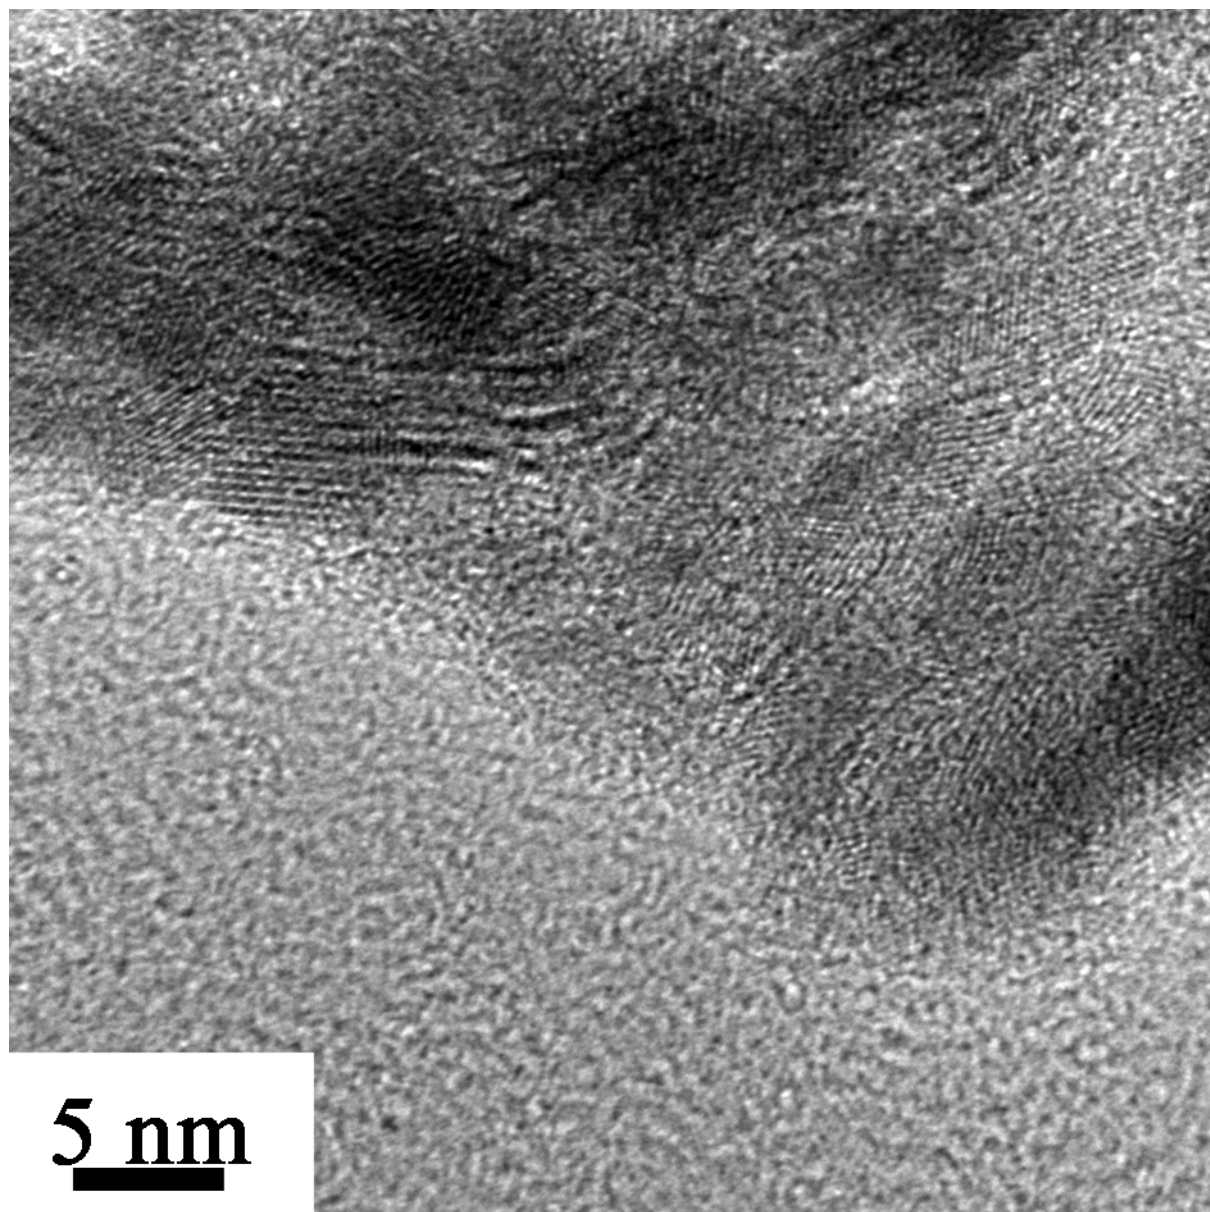

**Fig. S3** HRTEM image of the zone marked by a circle in Fig. 3d.

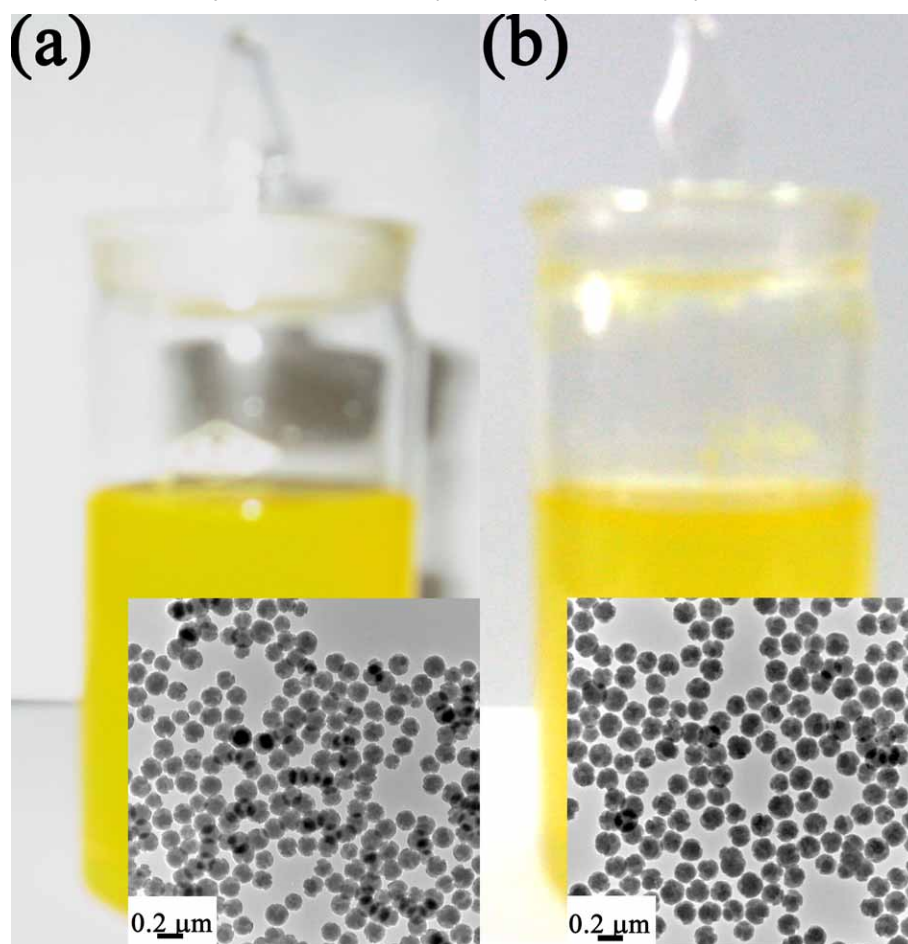

**Fig. S4** Photographs before (a) and after (b) heating treatment at 170 °C for 5 h without adding  $\text{Bi}^{3+}$  ions. The insets show the corresponding TEM images, respectively.
